# Supplementary material for: Plasmodium falciparum resistance to anti-malarial drugs in Papua New Guinea: evaluation of a community-based approach for the molecular monitoring of resistance
Source: Springer Nature journal article supplement (doi:10.1186/1475-2875-9-8), 2010-01-07
Supplement: Additional file 4 [file 1475-2875-9-8-s4.pdf]

**Supplementary table S4:** Maximum likelihood estimates of single allele and haplotype frequencies from health centre samples

| SNP                             | Sigimaru HC<br>(Karimui)<br>(N=97) |                | Kunjingini HC<br>(South Wosera)<br>(N=112) |                |
|---------------------------------|------------------------------------|----------------|--------------------------------------------|----------------|
|                                 | $\hat{p}$                          | 95%CI          | $\hat{p}$                                  | 95%CI          |
| <i>pfmdr1</i> N86Y              | 0.69                               | (0.60, 0.77)   | 0.99                                       | (0.98, 1.00)   |
| <i>pfmdr1</i> Y184F             | 0.05                               | (0.01, 0.09)   | 0.00                                       |                |
| <i>pfmdr1</i> N1042D            | 0.01                               | (0.00, 0.03)   | 0.00                                       |                |
| <i>pfcr1</i> K76T               | 0.91                               | (0.85, 0.96)   | 0.92                                       | (0.86, 0.97)   |
| <i>pfcr1</i> S163R              | 0.01                               | (0.00, 0.03)   | 0.01                                       | (0.00, 0.02)   |
| <i>pfcr1</i> A220S              | 0.80                               | (0.72, 0.87)   | 0.55                                       | (0.45, 0.66)   |
| <i>pfcr1</i> N326D              | 0.87                               | (0.80, 0.93)   | 0.90                                       | (0.84, 0.96)   |
| <i>pfcr1</i> I356L              | 0.87                               | (0.80, 0.93)   | 0.91                                       | (0.84, 0.96)   |
| <i>pfdhfr</i> S108N             | 0.85                               | (0.79, 0.90)   | 0.87                                       | (0.81, 0.92)   |
| <i>pfdhfr</i> C59R              | 0.79                               | (0.71, 0.86)   | 0.80                                       | (0.72, 0.88)   |
| <i>pfdhps</i> A437G             | 0.02                               | (0.00, 0.05)   | 0.23                                       | (0.15, 0.32)   |
| <i>pfdhps</i> K540E             | 0.03                               | (0.00, 0.07)   | 0.01                                       | (0.00, 0.03)   |
| <b>Haplotype</b>                |                                    |                |                                            |                |
| <i>pfmdr1</i> N86Y+Y184F+N1042D | $\hat{h}$                          | 95%CI          | $\hat{h}$                                  | 95%CI          |
| 000                             | 0.006                              | (0.0, 0.026)   | 0.261                                      | (0.203, 0.325) |
| 001                             | 0.0                                | (0.0, 0.012)   | 0.0                                        | (0.0, 0.010)   |
| 010                             | 0.994                              | (0.974, 0.999) | 0.687                                      | (0.620, 0.749) |
| 011                             | 0.0                                | (0.0, 0.011)   | 0.005                                      | (0.0, 0.021)   |
| 100                             | 0.0                                | (0.0, 0.012)   | 0.038                                      | (0.017, 0.071) |
| 101                             | 0.0                                | (0.0, 0.012)   | 0.010                                      | (0.001, 0.030) |
| 110                             | 0.0                                | (0.0, 0.011)   | 0.0                                        | (0.0, 0.010)   |
| 111                             | 0.0                                | (0.0, 0.012)   | 0.0                                        | (0.0, 0.010)   |
| <i>pfcr1</i> K76T+A220S+I356L   |                                    |                |                                            |                |
| 000                             | 0.072                              | (0.038, 0.119) | 0.090                                      | (0.055, 0.135) |
| 001                             | 0.0                                | (0.0, 0.013)   | 0.0                                        | (0.0, 0.010)   |
| 010                             | 0.0                                | (0.0, 0.013)   | 0.0                                        | (0.0, 0.010)   |
| 011                             | 0.0                                | (0.0, 0.013)   | 0.0                                        | (0.0, 0.010)   |
| 100                             | 0.019                              | (0.004, 0.048) | 0.030                                      | (0.011, 0.061) |
| 101                             | 0.343                              | (0.272, 0.418) | 0.082                                      | (0.049, 0.126) |
| 110                             | 0.0                                | (0.0, 0.013)   | 0.005                                      | (0.0, 0.022)   |
| 111                             | 0.566                              | (0.488, 0.642) | 0.793                                      | (0.732, 0.845) |
| <i>pfdhfr</i> C59R+S108N        |                                    |                |                                            |                |
| 00                              | 0.135                              | (0.089, 0.191) | 0.152                                      | (0.106, 0.206) |
| 01                              | 0.062                              | (0.032, 0.105) | 0.056                                      | (0.029, 0.095) |
| 10                              | 0.0                                | (0.0, 0.012)   | 0.0                                        | (0.0, 0.011)   |
| 11                              | 0.803                              | (0.740, 0.859) | 0.792                                      | (0.733, 0.845) |
| <i>pfdhps</i> A437G+K540E       |                                    |                |                                            |                |
| 00                              | 0.753                              | (0.684, 0.815) | 0.951                                      | (0.915, 0.976) |
| 01                              | 0.006                              | (0.0, 0.026)   | 0.029                                      | (0.011, 0.059) |
| 10                              | 0.235                              | (0.175, 0.304) | 0.020                                      | (0.005, 0.045) |
| 11                              | 0.006                              | (0.0, 0.026)   | 0.0                                        | (0.0, 0.010)   |

N, number of samples analyzed; SNP, single nucleotide polymorphism;  $\hat{p}$ , mutant allele frequency;  $\hat{h}$ , estimated haplotype frequency; 0 wild-type allele; 1, mutated allele; CI, confidence intervals determined from 10,000 bootstrap samples.
